# Supplementary material
Source: Springer Nature journal article supplement (https://www.springermedizin.de/resource/supplementary/12981_2011_217_MOESM2_ESM.pdf/9604074)

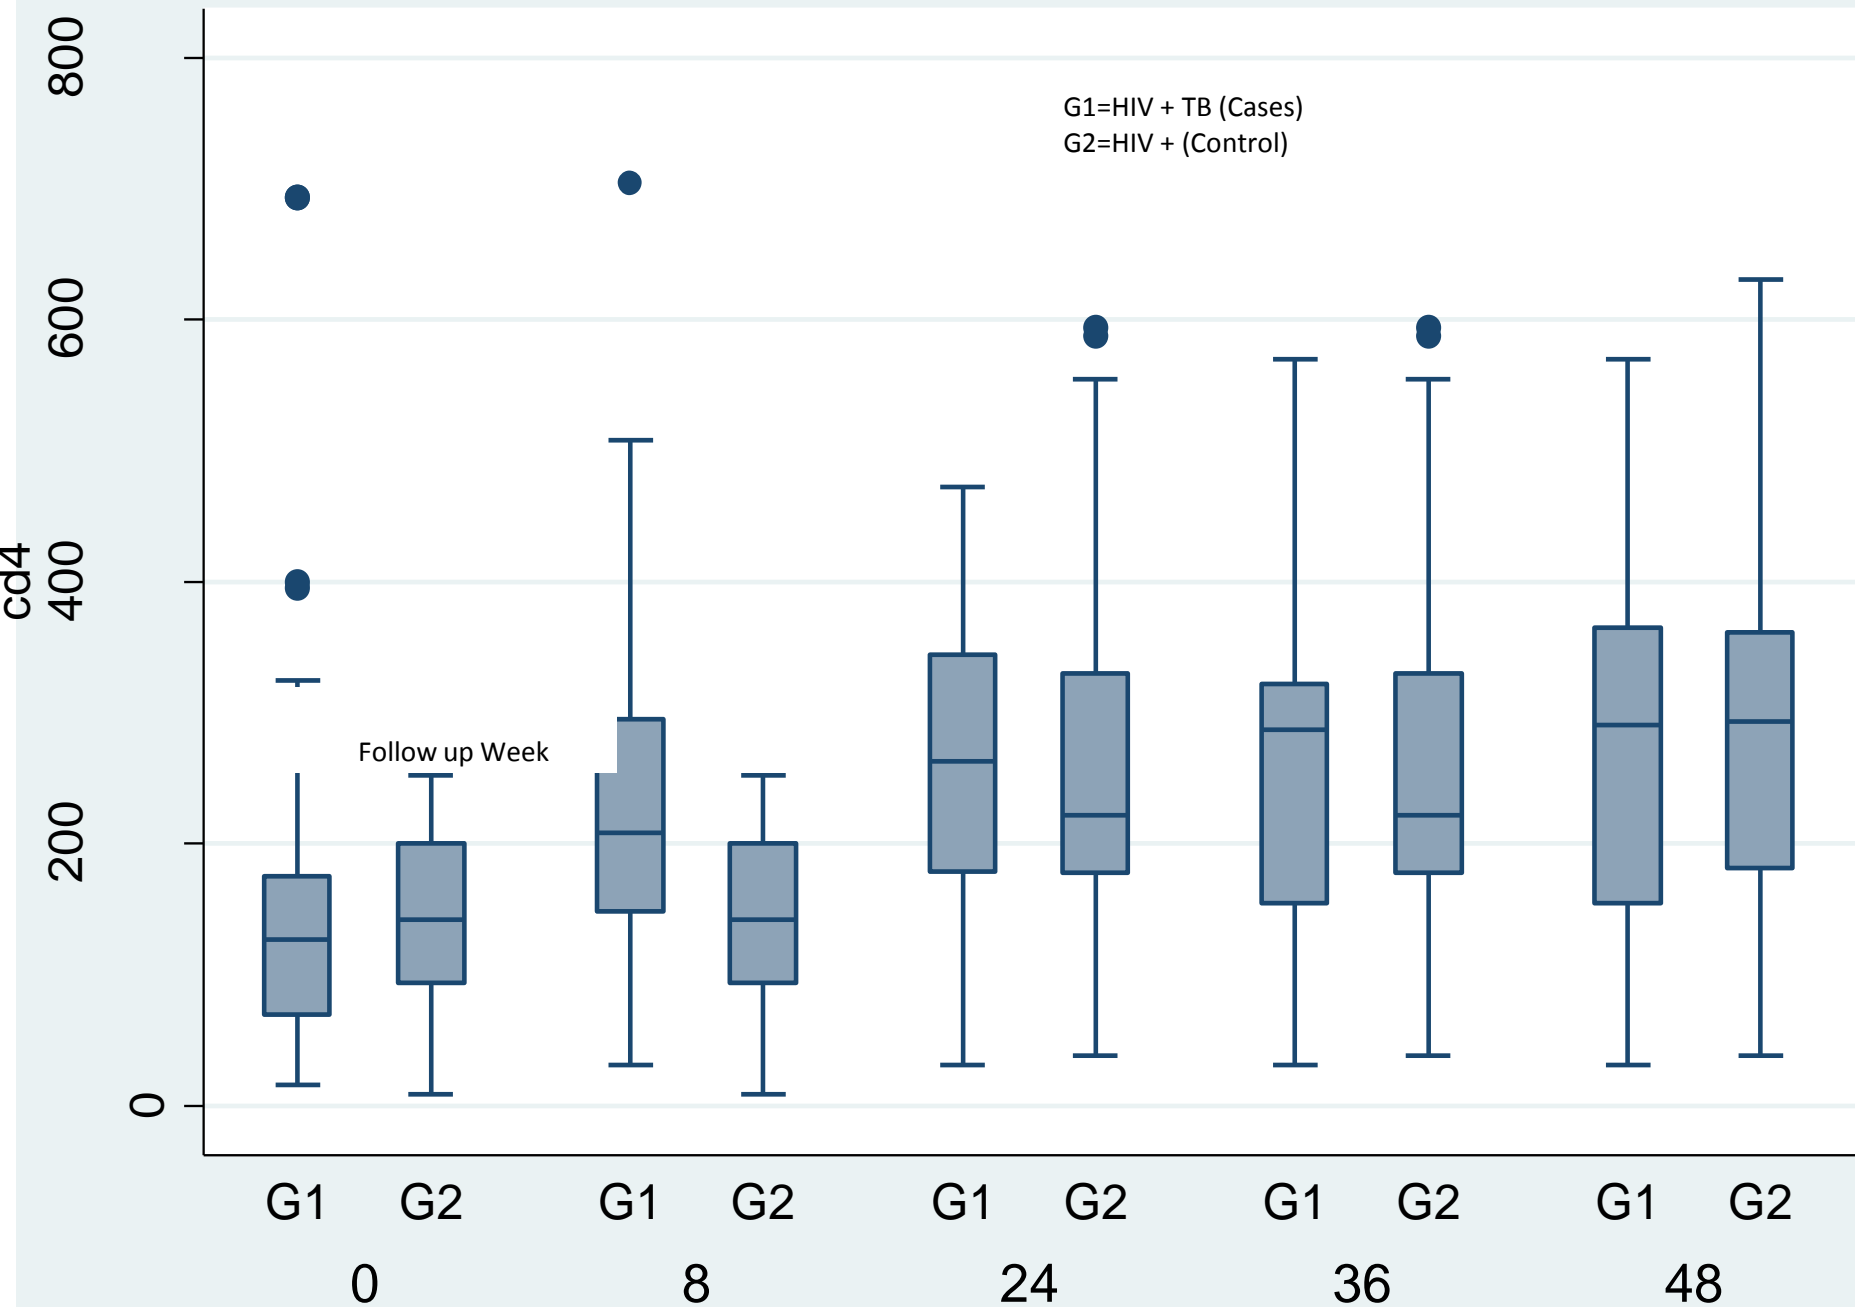

Supplement: MOESM2 [file 9604074]
